# Supplementary material for: The serotonin transporter sustains human brown adipose tissue thermogenesis
Source: PubMed Central journal article supplement (PMC10447248; doi:10.1038/s42255-023-00839-2), 2023-08-03
Supplement: 42255_2023_839_MOESM1_ESM.pdf [file 42255_2023_839_MOESM1_ESM.pdf]

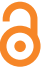

---

# The serotonin transporter sustains human brown adipose tissue thermogenesis

---

In the format provided by the authors and unedited

**SUPPLEMENTARY INFORMATION**

**SUPPLEMENTARY TABLE 1      *PARTICIPANT CHARACTERISTICS FOR ADIPOSE TISSUE COLLECTIONS.***

| <b>Experiment/<br/>Subject<br/>number</b> | <b>Operation</b>  | <b>Underlying diagnosis</b>    | <b>Age<br/>(years)</b> | <b>Sex</b> | <b>BMI<br/>(Kg/m<sup>2</sup>)</b> |
|-------------------------------------------|-------------------|--------------------------------|------------------------|------------|-----------------------------------|
| <b>Whole tissue mRNA and histology</b>    |                   |                                |                        |            |                                   |
| 1                                         | Parathyroidectomy | Primary hyperparathyroidism    | 66                     | Female     | 28.3                              |
| 2                                         | Parathyroidectomy | Primary hyperparathyroidism    | 63                     | Female     | 33.3                              |
| 3                                         | Thyroid lobectomy | Papillary carcinoma of thyroid | 45                     | Female     | 26.5                              |
| 4                                         | Thyroid lobectomy | Follicular adenoma             | 48                     | Female     | 17.8                              |
| 5                                         | Parathyroidectomy | Primary hyperparathyroidism    | 47                     | Male       | 23.4                              |
| 6                                         | Parathyroidectomy | Primary hyperparathyroidism    | 24                     | Male       | 27.7                              |
| 7                                         | Thyroidectomy     | Graves' disease                | 27                     | Female     | 30.1                              |
| 8                                         | Thyroidectomy     | Graves' disease                | 26                     | Female     | 20.9                              |
| 9                                         | Parathyroidectomy | Primary hyperparathyroidism    | 62                     | Female     | 28.4                              |
| 10                                        | Parathyroidectomy | Primary hyperparathyroidism    | 56                     | Male       | 27.2                              |
| <b>Cultured adipocytes for RNA seq</b>    |                   |                                |                        |            |                                   |
| 1                                         | Thyroid lobectomy | Follicular thyroid carcinoma   | 41                     | Female     | 27.5                              |
| 2                                         | Parathyroidectomy | Primary hyperparathyroidism    | 59                     | Female     | 24.5                              |
| 3                                         | Thyroidectomy     | Follicular thyroid carcinoma   | 52                     | Female     | 39.4                              |
| 4                                         | Thyroidectomy     | Multinodular goitre            | 50                     | Female     | 22.3                              |
| <b>Adipocytes for qPCR</b>                |                   |                                |                        |            |                                   |
| 1                                         | Parathyroidectomy | Primary hyperparathyroidism    | 51                     | Female     | 26.3                              |
| 2                                         | Thyroid lobectomy | Benign hyperplastic nodule     | 41                     | Female     | 28.6                              |
| 3                                         | Thyroidectomy     | Follicular carcinoma           | 35                     | Female     | 37.0                              |
| 4                                         | Parathyroidectomy | Primary hyperparathyroidism    | 70                     | Female     | 32.5                              |
| 5                                         | Parathyroidectomy | Primary hyperparathyroidism    | 58                     | Female     | 22.9                              |
| 6                                         | Parathyroidectomy | Primary hyperparathyroidism    | 59                     | Female     | 24.4                              |
| 7                                         | Thyroid lobectomy | Papillary thyroid carcinoma    | 36                     | Female     | 28.0                              |
| 8                                         | Parathyroidectomy | Primary hyperparathyroidism    | 61                     | Female     | 23.3                              |
| 9                                         | Parathyroidectomy | Primary hyperparathyroidism    | 67                     | Female     | 18.7                              |
| 10                                        | Parathyroidectomy | Primary hyperparathyroidism    | 62                     | Female     | 30.8                              |
| 11                                        | Parathyroidectomy | Primary hyperparathyroidism    | 63                     | Female     | 33.9                              |
| 12                                        | Parathyroidectomy | Primary hyperparathyroidism    | 68                     | Female     | 21.9                              |
| <b>Serotonin uptake</b>                   |                   |                                |                        |            |                                   |
| 1                                         | Parathyroidectomy | Primary hyperparathyroidism    | 45                     | Female     | 40.8                              |
| 2                                         | Parathyroidectomy | Primary hyperparathyroidism    | 60                     | Female     | 24.7                              |
| 3                                         | Parathyroidectomy | Primary hyperparathyroidism    | 51                     | Female     | 26.3                              |
| 4                                         | Parathyroidectomy | Primary hyperparathyroidism    | 59                     | Male       | 39.4                              |
| 5                                         | Thyroid lobectomy | Multinodular goitre            | 41                     | Female     | 28.6                              |
| 6                                         | Parathyroidectomy | Primary hyperparathyroidism    | 61                     | Female     | 22.6                              |
| <b>Serotonin Respirometry</b>             |                   |                                |                        |            |                                   |
| 1                                         | Parathyroidectomy | Primary hyperparathyroidism    | 74                     | Female     | 21.0                              |
| 2                                         | Parathyroidectomy | Primary hyperparathyroidism    | 58                     | Female     | 22.9                              |
| 3                                         | Parathyroidectomy | Primary hyperparathyroidism    | 59                     | Female     | 24.4                              |

|                                           |                     |                                |    |        |      |
|-------------------------------------------|---------------------|--------------------------------|----|--------|------|
| 4                                         | Parathyroidectomy   | Primary hyperparathyroidism    | 49 | Female | 36.0 |
| 5                                         | Parathyroidectomy   | Primary hyperparathyroidism    | 47 | Female | 37.6 |
| 6                                         | Thyroid Lobectomy   | Papillary carcinoma of thyroid | 36 | Female | 28.0 |
| 7                                         | Parathyroidectomy   | Primary hyperparathyroidism    | 69 | Female | 30.5 |
| 8                                         | Parathyroidectomy   | Primary hyperparathyroidism    | 62 | Female | 30.8 |
| 9                                         | Thyroid lobectomy   | Follicular adenoma             | 29 | Female | 21.2 |
| 10                                        | Parathyroidectomy   | Primary hyperparathyroidism    | 62 | Female | 22.4 |
| 11                                        | Thyroidectomy       | Graves' disease                | 68 | Female | 28.3 |
| 12                                        | Thyroid lobectomy   | Hurthle cell carcinoma         | 61 | Female | 30.5 |
| 13                                        | Parathyroidectomy   | Primary hyperparathyroidism    | 76 | Male   | 26.5 |
| 14                                        | Parathyroidectomy   | Primary hyperparathyroidism    | 63 | Female | 27.1 |
| <b>Serotonin regulation of UCP1</b>       |                     |                                |    |        |      |
| 1                                         | Parathyroidectomy   | Primary hyperparathyroidism    | 21 | Female | 30.1 |
| 2                                         | Parathyroidectomy   | Primary hyperparathyroidism    | 52 | Female | 35.7 |
| 3                                         | Parathyroidectomy   | Primary hyperparathyroidism    | 36 | Male   | 37.0 |
| 4                                         | Parathyroidectomy   | Primary hyperparathyroidism    | 56 | Female | 31.2 |
| 5                                         | Parathyroidectomy   | Primary hyperparathyroidism    | 70 | Female | 27.9 |
| 6                                         | Parathyroidectomy   | Primary hyperparathyroidism    | 58 | Female | 23.8 |
| 7                                         | Parathyroidectomy   | Primary hyperparathyroidism    | 70 | Female | 32.5 |
| 8                                         | Parathyroidectomy   | Primary hyperparathyroidism    | 74 | Female | 21.0 |
| 9                                         | Parathyroidectomy   | Primary hyperparathyroidism    | 57 | Female | 49.5 |
| 10                                        | Parathyroidectomy   | Primary hyperparathyroidism    | 58 | Female | 22.9 |
| 11                                        | Parathyroidectomy   | Primary hyperparathyroidism    | 59 | Female | 24.4 |
| 12                                        | Parathyroidectomy   | Primary hyperparathyroidism    | 49 | Female | 36.0 |
| 13                                        | Parathyroidectomy   | Primary hyperparathyroidism    | 55 | Female | 27.5 |
| 14                                        | Parathyroidectomy   | Primary hyperparathyroidism    | 47 | Female | 37.6 |
| <b>Serotonin/ SSRI respirometry</b>       |                     |                                |    |        |      |
| 1                                         | Thyroid lobectomy   | Hurthle cell carcinoma         | 54 | Female | 23.7 |
| 2                                         | Parathyroidectomy   | Primary hyperparathyroidism    | 76 | Male   | 26.5 |
| 3                                         | Parathyroidectomy   | Primary hyperparathyroidism    | 63 | Female | 27.1 |
| 4                                         | Parathyroidectomy   | Primary hyperparathyroidism    | 36 | Female | 19.7 |
| 5                                         | Graves' disease     | Thyroidectomy                  | 51 | Female | 23.2 |
| 6                                         | Parathyroidectomy   | Primary hyperparathyroidism    | 40 | Male   | 26.6 |
| 7                                         | Parathyroidectomy   | Primary hyperparathyroidism    | 26 | Male   | 31.4 |
| 8                                         | Graves' disease     | Thyroidectomy                  | 65 | Male   | 19.8 |
| 9                                         | Multinodular goitre | Thyroidectomy                  | 32 | Female | 24.9 |
| <b>Serotonin/ SSRI regulation of UCP1</b> |                     |                                |    |        |      |
| 1                                         | Thyroid lobectomy   | Papillary carcinoma of thyroid | 36 | Female | 28.0 |
| 2                                         | Parathyroidectomy   | Primary hyperparathyroidism    | 69 | Female | 30.5 |
| 3                                         | Parathyroidectomy   | Primary hyperparathyroidism    | 67 | Female | 18.7 |
| 4                                         | Parathyroidectomy   | Primary hyperparathyroidism    | 62 | Female | 30.8 |
| 5                                         | Parathyroidectomy   | Primary hyperparathyroidism    | 68 | Female | 21.9 |
| 6                                         | Thyroidectomy       | Graves' disease                | 68 | Female | 28.3 |
| 7                                         | Parathyroidectomy   | Primary hyperparathyroidism    | 76 | Male   | 26.5 |
| 8                                         | Parathyroidectomy   | Primary hyperparathyroidism    | 31 | Female | 32.1 |
| 9                                         | Parathyroidectomy   | Primary hyperparathyroidism    | 71 | Female | 29.3 |

|                                         |                     |                             |    |        |      |
|-----------------------------------------|---------------------|-----------------------------|----|--------|------|
| <b>5-HT receptor regulation of UCP1</b> |                     |                             |    |        |      |
| <b>1</b>                                | Parathyroidectomy   | Primary hyperparathyroidism | 70 | Female | 28.5 |
| <b>2</b>                                | Parathyroidectomy   | Primary hyperparathyroidism | 68 | Female | 29.4 |
| <b>3</b>                                | Parathyroidectomy   | Primary hyperparathyroidism | 60 | Female | 31.5 |
| <b>4</b>                                | Parathyroidectomy   | Primary hyperparathyroidism | 36 | Female | 50.3 |
| <b>5</b>                                | Thyroidectomy       | Graves' disease             | 53 | Female | 27.3 |
| <b>6</b>                                | Thyroidectomy       | Hurthle cell adenomas       | 47 | Female | 19.8 |
| <b>7</b>                                | Thyroidectomy       | Graves' disease             | 38 | Female | 27.5 |
| <b>8</b>                                | Thyroidectomy       | Graves' disease             | 65 | Male   | 23.5 |
| <b>9</b>                                | Parathyroidectomy   | Primary hyperparathyroidism | 51 | Male   | 28.0 |
| <b>10</b>                               | Thyroid Lobectomy   | Multinodular goitre         | 64 | Female | 30.8 |
|                                         |                     |                             |    |        |      |
| <b>HTR2A/B knockdown</b>                |                     |                             |    |        |      |
| <b>1</b>                                | Thyroidectomy       | Follicular adenoma          | 67 | Male   | 33.7 |
| <b>2</b>                                | Parathyroidectomy   | Primary hyperparathyroidism | 49 | Female | 22.9 |
| <b>3</b>                                | Graves' disease     | Thyroidectomy               | 65 | Male   | 19.8 |
| <b>4</b>                                | Parathyroidectomy   | Primary hyperparathyroidism | 73 | Female | 24.0 |
| <b>5</b>                                | Multinodular goitre | Thyroidectomy               | 32 | Female | 24.9 |
| <b>6</b>                                | Parathyroidectomy   | Primary hyperparathyroidism | 59 | Female | 29.8 |
